# Supplementary material for: Isogenic GAA-KO Murine Muscle Cell Lines Mimicking Severe Pompe Mutations as Preclinical Models for the Screening of Potential Gene Therapy Strategies
Source: MDPI journal article supplement (doi:10.3390/ijms23116298), 2022-06-04
Supplement: s1 [file s1]

## Supplemental Materials

# Isogenic GAA-KO Murine Muscle Cell Lines Mimicking Severe Pompe Mutations as Preclinical Models for the Screening of Potential Gene Therapy Strategies

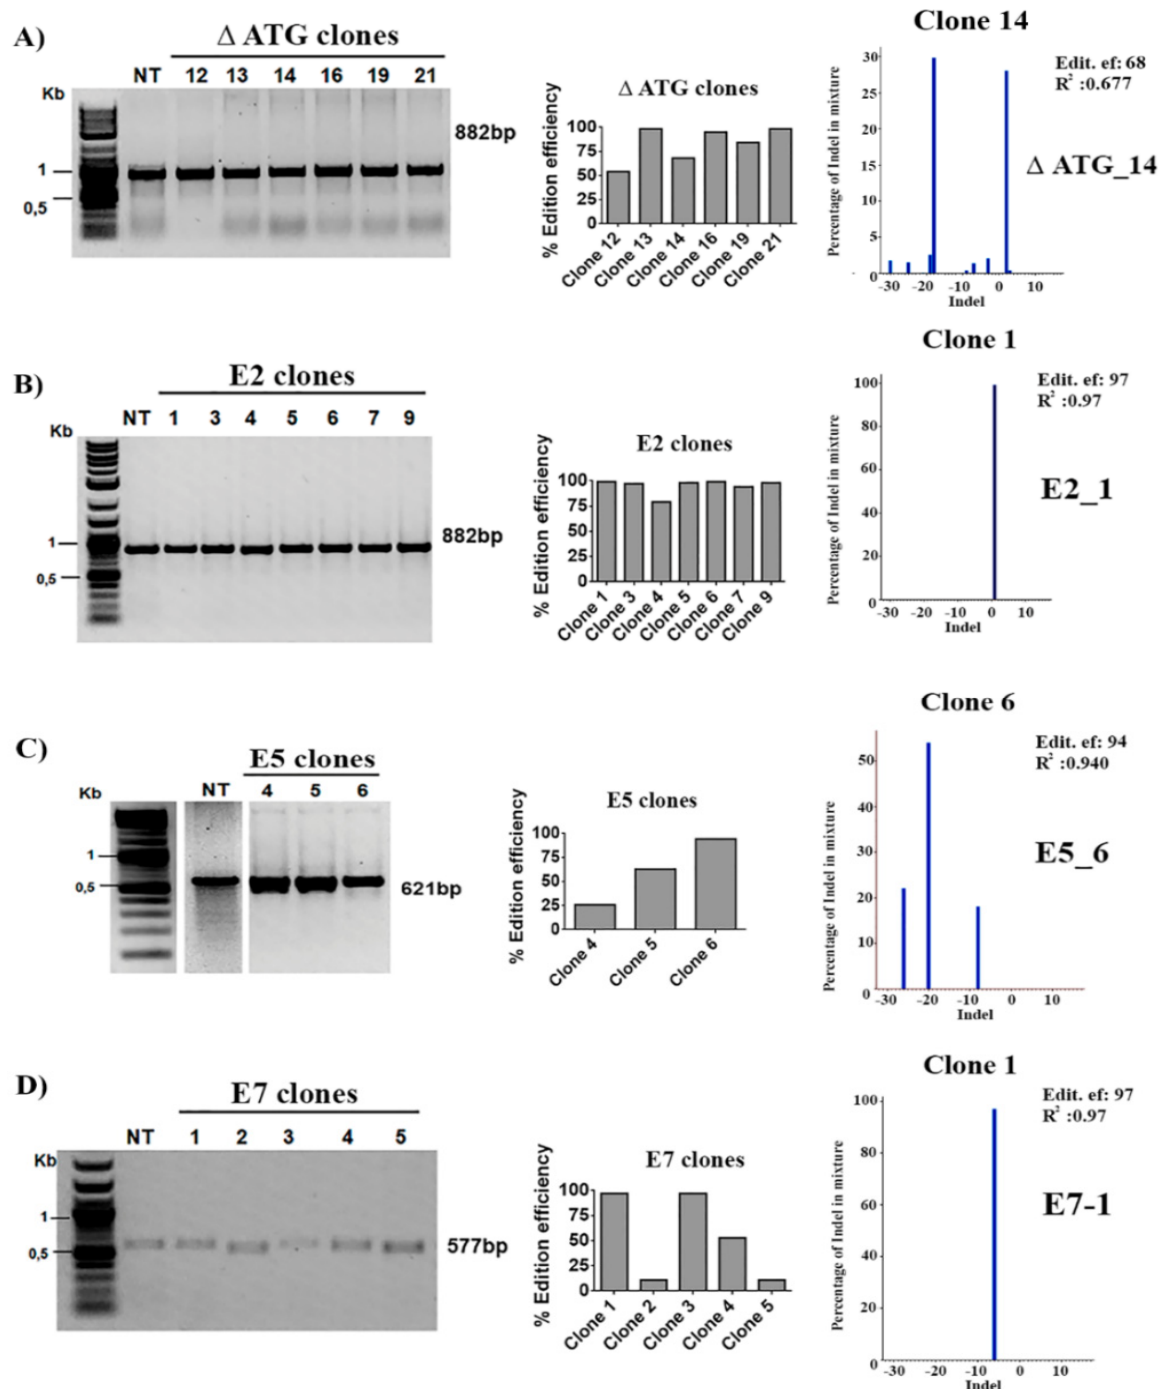

**Figure S1.** Analysis of different clones from Sol8 cells nucleofected with Cas9/RNAs RNP for the generation of different mutations homologous to those found in Pompe patients;  $\Delta$  ATG, E2, E5 and E7. Agarose gel showing the PCR of the amplified fragment (right panel) that was sequenced in order to determine the efficacy (middle graph) of several clones obtained from Sol8 cells nucleofected with Cas9/RNAs RNP harbouring the sgRNA\_  $\Delta$  ATG; GAGGGGCTTCCGTATATTCA (A,  $\Delta$  ATG clones), the sgRNA\_E2; ATCTCACAGGAGCAATGCG (B, E2 clones), the sgRNA\_E5;

TTGCTAAACAGCAATGCCAT (C, E5 clones), and the sgRNA\_E7; AGGTAGTGGA-GAACATGACC (D, E7 clones). The graphs showing the indels of the selected clones for each type of mutation ( $\Delta$  ATG\_14, E2\_1, E5\_6 and E7\_1) are shown at the right. In this graph, the co-ordinate 0 represents the cut site, negative values represent deletions of different length and positive values represent insertions of different lengths.

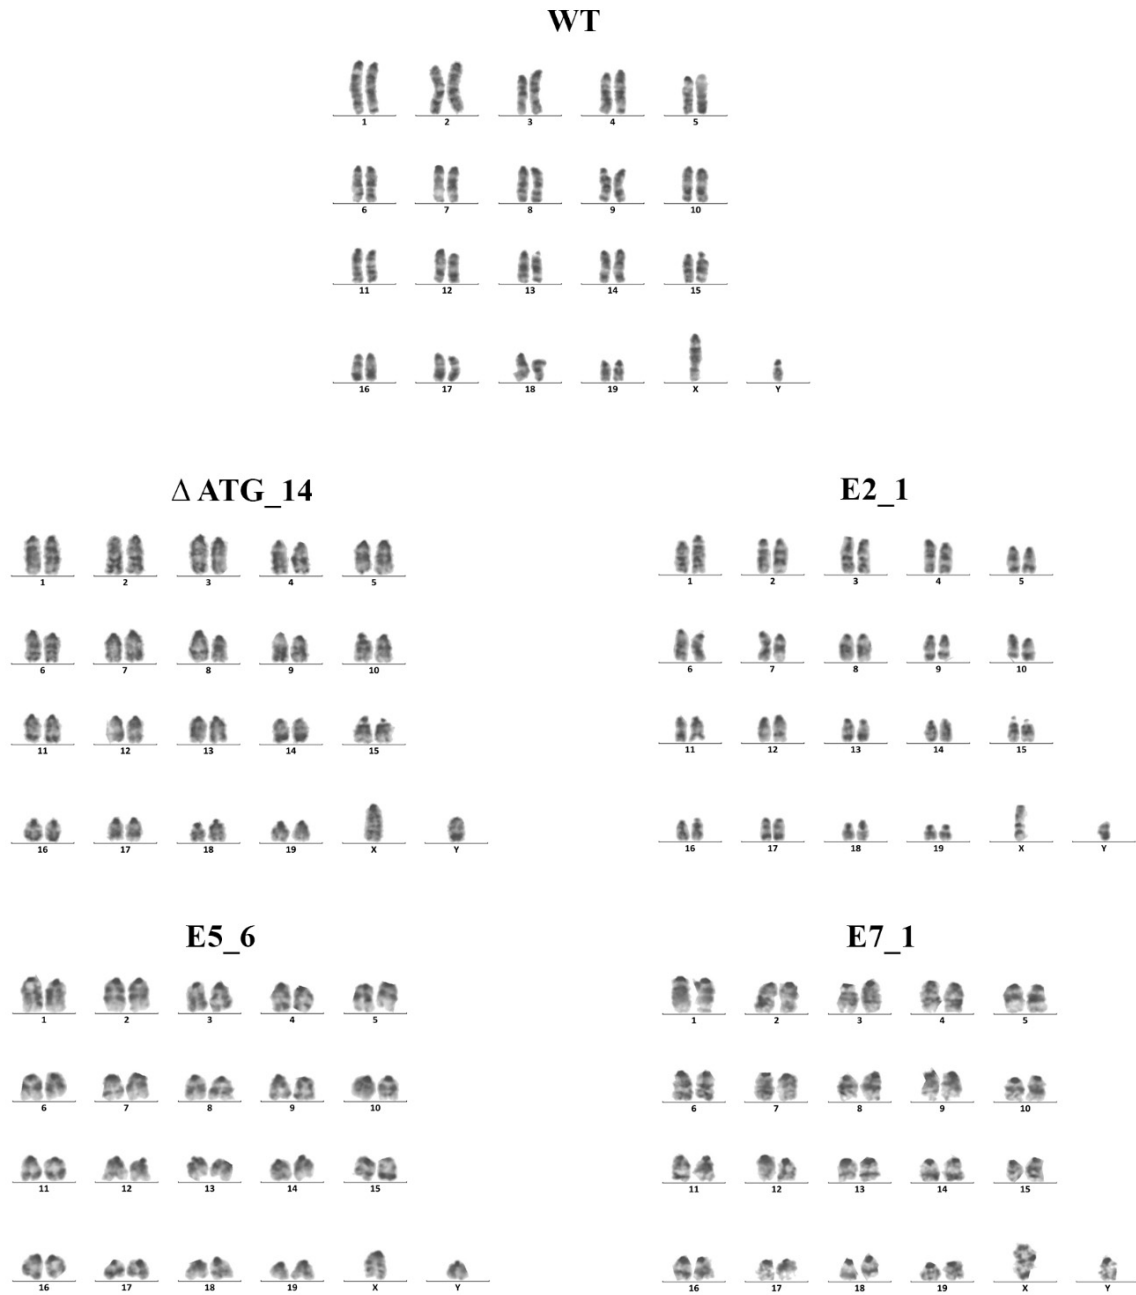

**Figure S2.** Cytogenetic analysis of Sol8 cells (WT and generated clones:  $\Delta$  ATG\_14, E2\_1, E5\_6 and E7\_1). Normal chromosome set in all murine cell lines generated. Karyotype 40, XY (G-band technique).

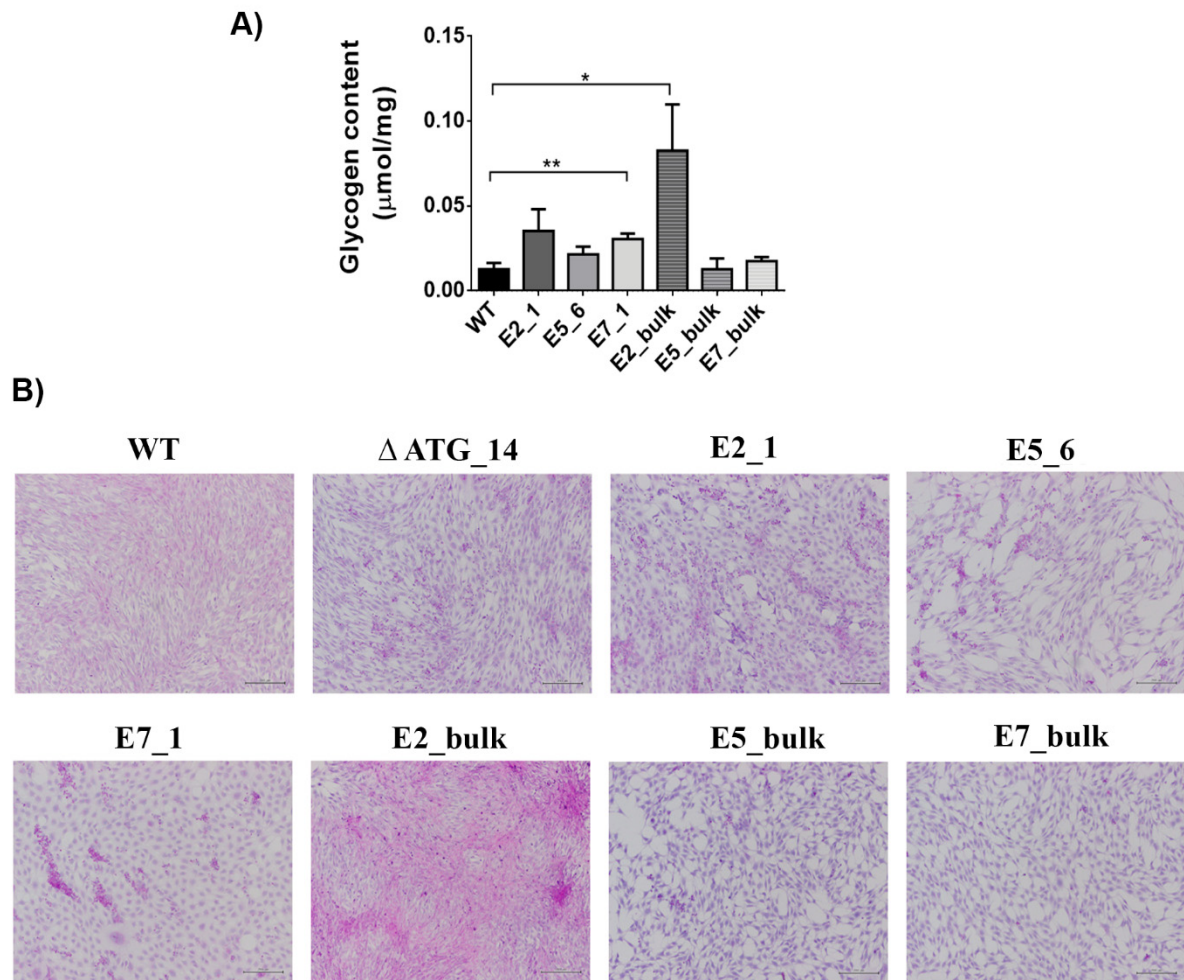

**Figure S3.** Glycogen accumulation in GAA-KO Sol8 clones differentiated into myotubes. A) Glycogen content in Sol8 cell myoblasts differentiated into myotubes (see M&M) in clones (E2\_1, E5\_6 and E7\_1) and bulk populations (E2\_bulk, E5\_bulk and E7\_bulk) compared to Sol8 wild-type (WT). B) PAS staining for glycogen visualisation in GAA-KO Sol8 clones and bulk population after differentiation into myotubes. Images obtained with an Olympus upright BX43 microscope (10x objective). Representative images are shown. Scale bar 200  $\mu$ m.

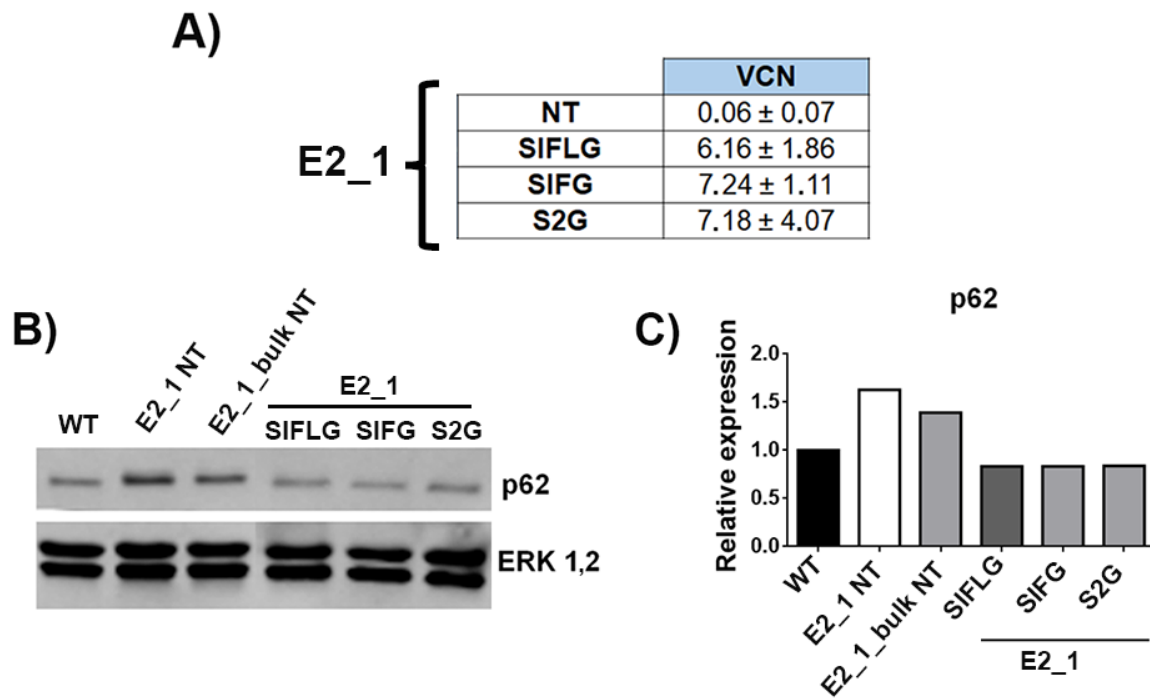

**Figure S4. Rescue of p62 levels in Sol8 E2\_1 cells transduced with LVs expressing the different mGAA chimeras.** A) Vector copy number (VCN) of murine cells Sol8 E2\_1 transduced with lentiviral vectors (LVs) expressing the different murine GAAs chimeras, SIFLG, SIFG and S2G. Western-blot images of p62 (B, top) and ERK1,2 (B, bottom) and quantification (C) of p62 expression levels in Sol8 wild-type (WT), E2\_1 clone (E2\_1 NT), E2\_bulk (E2\_bulk NT) and the E2\_1 clone transduced with the different LVs (SIFLG, SIFG and S2G). The quantification was normalised to ERK1,2 levels using the ImageJ program. <https://imagej.nih.gov/ij/>.

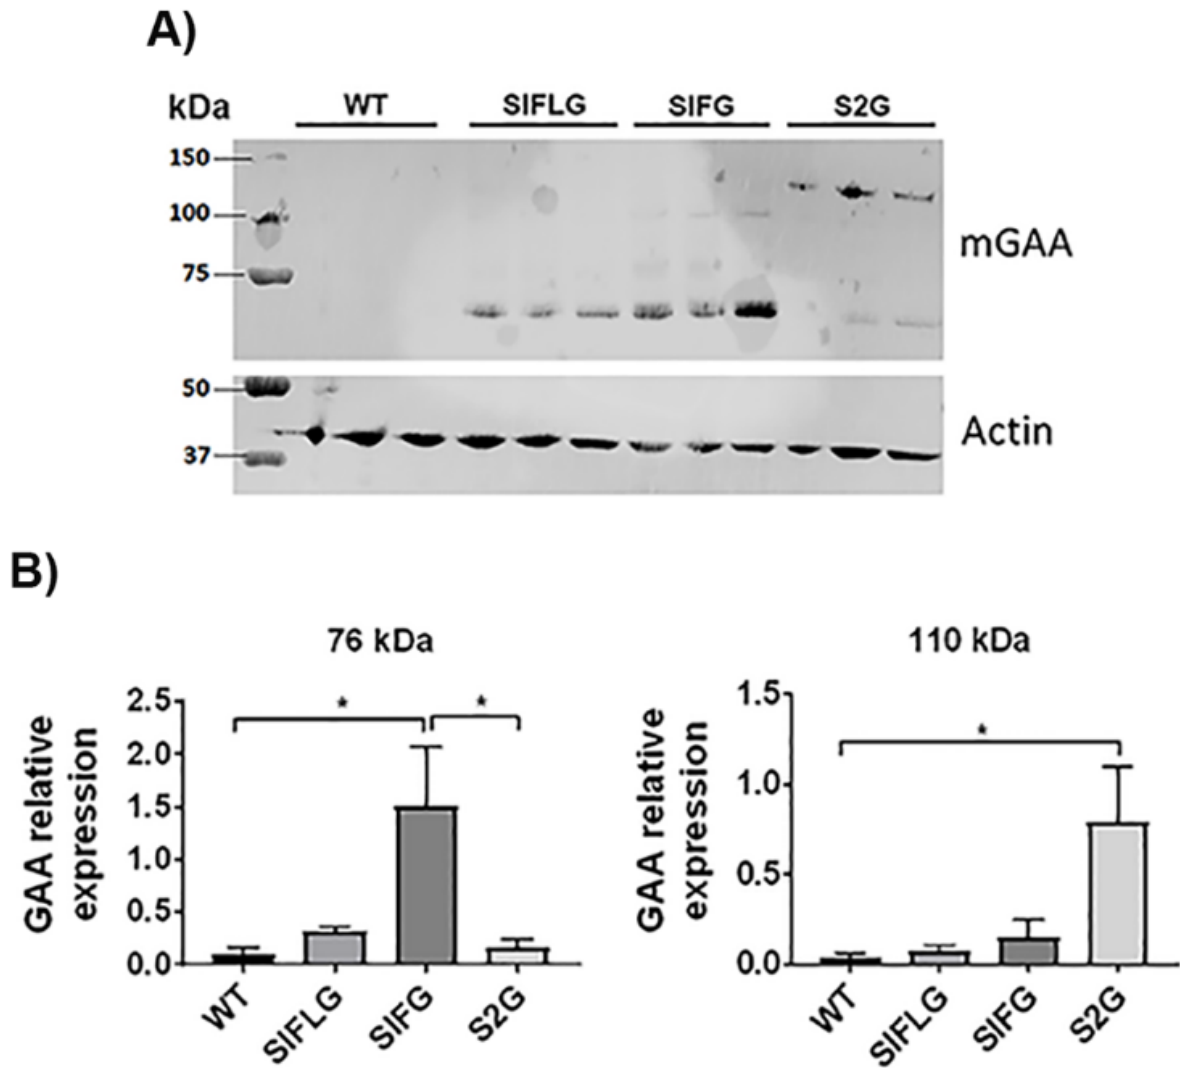

**Figure S5.** Intracellular GAA isoforms in Hepa 1-6 transduced cells. Western-blot image of GAA (A, top) and actin (A, bottom) expression levels in Hepa 1-6 cells (a murine model of hepatocellular carcinoma) (WT) and Hepa 1-6 transduced with the different LVs (SIFLG, SIFG and S2G) (triplicates). B) Quantification of intracellular processed (76 kDa) and unprocessed (110 kDa) mGAA levels normalised to actin levels. Quantification was performed using the ImageJ program. <https://imagej.nih.gov/ij/>. Statistical analyses were performed with unpaired t-test (two tails, \* $p < 0.05$ ). Values represent means  $\pm$  SEM.

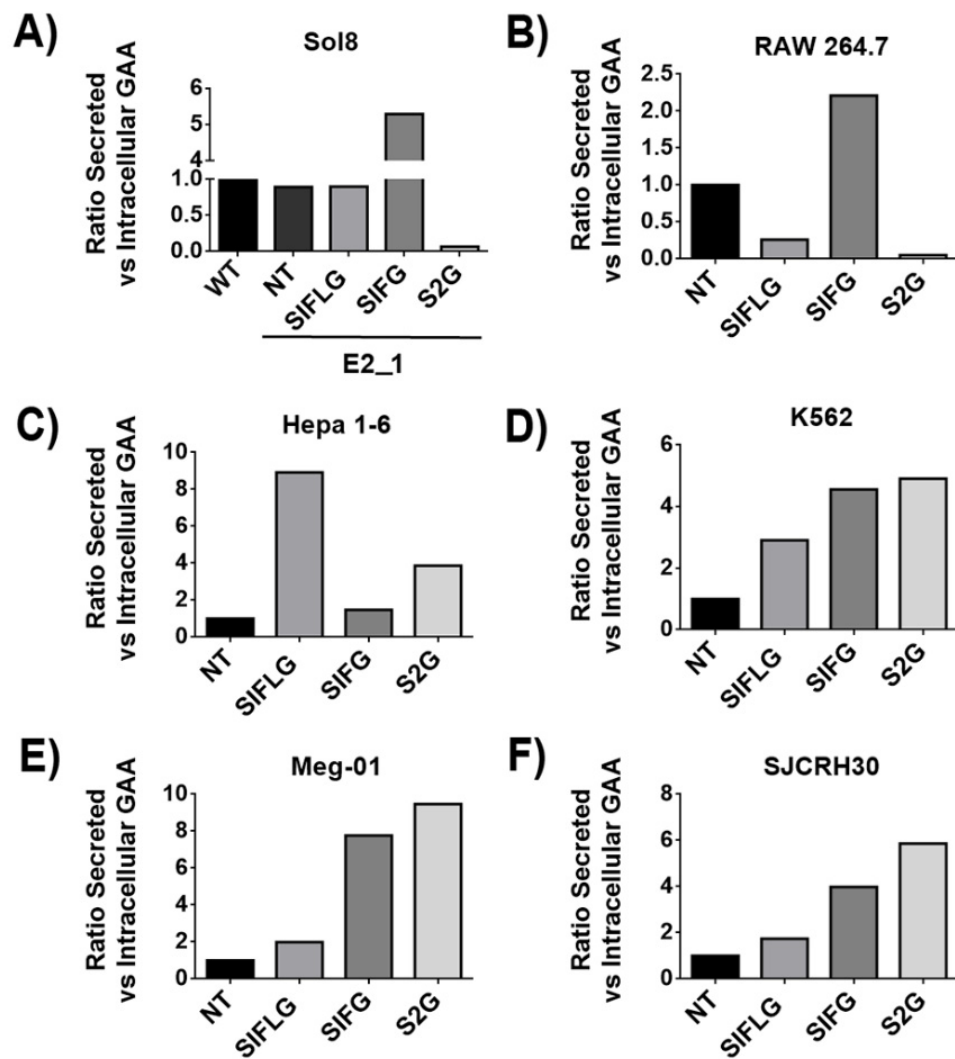

**Figure S6.** Secreted GAA vs. intracellular GAA ratio in E2\_1 transduced cells, RAW 264.7, Hepa 1-6, K562, Meg-01 and SJCRH30 cells. Analysis of secreted versus intracellular GAA analysed by Western-blot in Figures 4B,E,F and Figure 5. Quantification was performed using the ImageJ program. <https://imagej.nih.gov/ij/>.

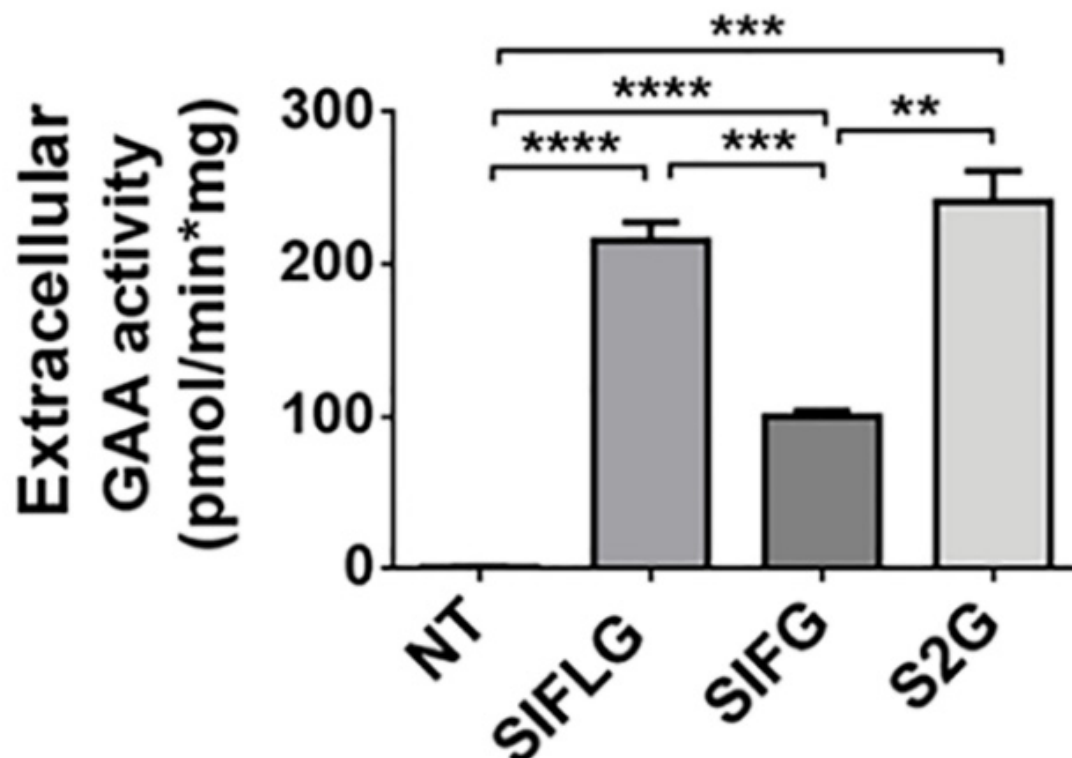

**Figure S7.** Activity of the GAA secreted to the media by transduced K562. Analysis of mGAA activity in the media secreted by transduced K562 cells (conditioned media) with the different constructs. NT cells were used as negative control (non-transduced K562 cells). Unpaired t test (two tails, \* $p < 0.05$ ). Values represent means  $\pm$  SEM of at least three separate experiments (\* $p < 0.05$ ).

| Score          | Expect                                                        | Method                       | Identities | Positives  | Gaps     |
|----------------|---------------------------------------------------------------|------------------------------|------------|------------|----------|
| 158 bits(400)  | 2e-56                                                         | Compositional matrix adjust. | 77/85(91%) | 80/85(94%) | 0/85(0%) |
| <b>hIGF2</b> — | MGIPMGKSMVLVLLTFLAFASCCIAALCGGELVDTLQFVCGDRGFYFSRPASRVSRRSRGI |                              |            |            | 60       |
|                | MGIP+GKSMVLVLL LAFA CCIAALCGGELVDTLQFVC DRGFYFSRP+SR +RRSRGI  |                              |            |            |          |
| <b>mIGF2</b> — | MGIPVGKSMVLVLLISLAFALCCIAALCGGELVDTLQFVCSDRGFYFSRPSSRANRRSRGI |                              |            |            | 60       |
| <b>hIGF2</b> — | VEECCFRSCDLALLETCATPAKSE                                      |                              |            |            | 85       |
|                | VEECCFRSCDLALLETCATPAKSE                                      |                              |            |            |          |
| <b>mIGF2</b> — | VEECCFRSCDLALLETCATPAKSE                                      |                              |            |            | 85       |

**Figure S8. Comparison of IGF2 sequences.** Blast analysis of the mice and human IGF2 amino acid sequences used in the murine IGF2-GAA (2G) and the human IGF2-GAA chimeras.

**Table S1. Comparison of GAA mutations in Sol8 clones and those found in similar regions in Pompe patients.** The mutations generated in the different GAA-KO murine muscle cell models ( $\Delta$  ATG\_14, E2\_1, E5\_6 and E7\_1) were obtained by sequencing their GAA cDNA. The location of the mutation (location), the affected alleles (Allele), type of mutation (DNA nomenclature) and type of protein mutation (Protein nomenclature) are shown for each Sol8 clone (left, GAA-KO murine muscle cell models) and for Pompe patients harbouring equivalent mutations. Clones E2\_1 and E7\_1 are homozygous for c.306\_307insT and c.1176\_1181del mutations, respectively. Clones  $\Delta$  ATG\_14 and E5\_6 have a different mutation in each allele (as described in the table). Pompe patients' mutations were obtained from Pompe variant database (<https://www.pompevariantdatabase.nl>). Similar mutations from Pompe patients that mimic what occurs in our generated GAA-KO models were selected.

| GAA-KO murine muscle cell models |          |        |                   | Pompe patients' mutations from database of the Pompe Center |          |                   |                         |                      |                                 |
|----------------------------------|----------|--------|-------------------|-------------------------------------------------------------|----------|-------------------|-------------------------|----------------------|---------------------------------|
|                                  | Location | Allele | DNA nomenclature  | Protein nomenclature                                        | Location | DNA nomenclature  | Protein nomenclature    | Pre-dicted se-verity | Phenotype with null allele      |
| $\Delta$ ATG_14                  | Exon 2   | 1      | c.-11_8del        | p.(0)                                                       | Exon 2   | c.3G>A            | p.(0)                   | Very se-vere         | Classic in-fantile or childhood |
|                                  |          | 2      | c.4_5insT         | p.(Asn2Ilefr*43)                                            | Exon 2   | c.18_25del        | p.(Cys8Profs*24)        | Very se-vere         | Classic in-fantile              |
| E2_1                             | Exon 2   | 1,2    | c.306_307ins<br>T | p.(Lys103Cysfr*85)<br>)                                     | Exon 2   | c.340_341ins<br>T | p.(Lys114Ilefs*32)      | Very se-vere         | Classic in-fantile              |
| E5_6                             | Exon 5   | 1      | c.950_957del      | p.(Met317Hisfs*83)<br>)                                     | Exon 6   | c.982_988del      | p.(Leu328Glyfs*62)<br>) | Very se-vere         | Classic in-fantile              |
|                                  |          | 2      | c.943_962del      | p.(Ser314Thrfs*82)                                          |          |                   |                         |                      |                                 |
| E7_1                             | Exon 7   | 1,2    | c.1176_1181del    | p.(Arg393Thr394de<br>l)                                     | Exon 8   | c.1199_1210del    | p.(Val400Asn403de<br>l) | Very se-vere         | Classic in-fantile              |

**Table S2. Off-target selection and primers of Sol8 GAA-KO clones.** Description of potential off-targets selected from Synthego CRISPR design tool for the different gRNAs (g1, gCys, gE5 and gE7) used for the generation of  $\Delta$  ATG\_14, E2\_1, E5\_6 and E7\_1 clones. Primers selected for their analysis are shown (right). A PCR for each off-target was performed, PCR product sequenced and an ICE analysis. No indels were found (no off-target could be detected).

| Mismatches      | Potential off-targets              | Primers                                                                           |
|-----------------|------------------------------------|-----------------------------------------------------------------------------------|
| g1 (score = 81) | 3<br>GAGGGGCTTCGTGGAATCA<br>chr15  | Fw g-ATG OFF1<br>AGTGACCTCCTCCAAGTTTC<br>Rev g-ATG OFF1<br>GTTTCATAGGAACAGCATCTTC |
|                 | 3<br>GAGGGGCTTCTGTTTATTCT<br>chr8  | Fw g-ATG OFF2<br>CAGACTCATCAGCCAACTTG<br>Rev g-ATG OFF2<br>TGATGTCCCAGCTCCTTG     |
|                 | 3<br>GAGGGGCTTCCTTAATTTC<br>chr11  | Fw g-ATG OFF3<br>CTGCCTCAAATTCTCTTGG<br>Rev g-ATG OFF3<br>GCTAAGCTACTTCCCTGTCAA   |
|                 | 3<br>GAGGGGCTTCCCAATATCCA<br>chr17 | Fw g-ATG OFF4<br>CAACAGAACTCTAGAGCCCC<br>Rev g-ATG OFF4<br>CCATCTCTCCAGCAATTCTTA  |
|                 | 4<br>TGGTGGCCTCCGTATATTCA<br>chr3  | Fw g-ATG OFF6<br>GACTTCCCTAAGCCTGCTCTT<br>Rev g-ATG OFF6<br>AGTGGGATTGGCCAGTGAGT  |



|                   |   |                      |                     |                        |
|-------------------|---|----------------------|---------------------|------------------------|
| gCys (score = 55) | 4 | GAGGAGCTTACGTATAACCA | Fw g-ATG<br>OFF7    | AGCAAGGAACCCCTGAAGATG  |
|                   |   | chr2                 | Rev g-ATG<br>OFF7   | TCATGTCTGTGTGCACGGTT   |
|                   | 4 | TAGGGGCTTACGTGTTTCA  | Fw g-ATG<br>OFF8    | AGGCCAACGTGTAAGTGCTA   |
|                   |   | chr18                | Rev g-ATG<br>OFF8   | CAGCTCCACTCACTTCCCAC   |
|                   | 4 | GAAGGGTTTCTGTAAATTCA | Fw g-ATG<br>OFF9    | CAGAGCCTGGCACGAATATG   |
|                   |   | chr6                 | Rev g-ATG<br>OFF9   | TCCTTGGCCAGAATACCTCCT  |
|                   | 4 | GAGGAGCTTCAGAATTTTCA | Fw g-ATG<br>OFF10   | TTGGTGCAGGATAATCAGGTGG |
|                   |   | chr10                | Rev g-ATG<br>OFF10  | AGAGGTTCTGGGTTTCAGGTG  |
|                   | 3 | CATCTCACAGCAGAAATGCA | Fw g- Cys<br>OFF1   | CCCCAGGTTACCTATGGAGGA  |
|                   |   | chr13                | Rev g- Cys<br>OFF1  | AGCCTATCTACGTTTGCCCC   |
|                   | 3 | CATCTCAAAAGAGCAATGCT | Fw g- Cys<br>OFF2   | CTTCGGCTTCAGACAGTCCTT  |
|                   |   | chr8                 | Rev g- Cys<br>OFF2  | GCAACTTCAAGTGTCACATCC  |
|                   | 3 | CATCTCACAGGAGTAATGGA | Fw g- Cys<br>OFF3   | ACAGATCCCATGACCTTGCTC  |
|                   |   | chr16                | Rev g- Cys<br>OFF3  | AGTAATGCACCCTGGAGAAGC  |
|                   | 3 | CATCTCACAAGAGGAATGCT | Fw g- Cys<br>OFF4   | CCAGTGCACCTCCTCCCATT   |
|                   |   | chr9                 | Rev g- Cys<br>OFF4  | CAAGTGGCTGTCCCGAATCT   |
|                   | 3 | GATATCACAGGAGCAGTGCG | Fw g- Cys<br>OFF5   | GTCAAACGCAGGTGACATCC   |
|                   |   | chr5                 | Rev g- Cys<br>OFF5  | TGTGTGTGTGCTAGGAACCG   |
| gE5 (score = 54)  | 3 | CATCTCACCAGAGCAATGCT | Fw g- Cys<br>OFF6   | AGCCTTGACATTTTCGAATGGT |
|                   |   | chr15                | Rev g- Cys<br>OFF6  | TGAGGTCTGAGGACTTTTGGG  |
|                   | 3 | CTTCTCAGAGGAGCAATGGG | Fw g- Cys<br>OFF8   | ATGACGTGAGAGTGGTGGTG   |
|                   |   | chr1                 | Rev g- Cys<br>OFF8  | TCCAGTCCATTTCTGGGCAC   |
|                   | 3 | CAGCTCACAGGAGCCATGAG | Fw g- Cys<br>OFF9   | CCTCCCCACACATCCTACCA   |
|                   |   | chr9                 | Rev g- Cys<br>OFF9  | CTTCTCCACCCAGCACTCATT  |
|                   | 3 | TTTCTAAACAGCAGTGCCCT | Fw g-MutE5<br>OFF1  | ATCCAATTTCGGTGCTGCTGT  |
|                   |   | chr9                 | Rev g-MutE5<br>OFF1 | TTGAAGAGCCAGTATGCGTGT  |
|                   | 3 | CTGATGAACAGCAATGCCAT | Fw g-MutE5<br>OFF2  | GCCTAGGCTGCCCTAAAAGC   |
|                   |   | chr6                 | Rev g-MutE5<br>OFF2 | TGTTGCATGCAGGAGTCTACA  |
|                   | 3 | CTGTTGAACAGCAATGCCAT | Fw g-MutE5<br>OFF7  | AGAAGCCAAGGTCAAACAAGG  |
|                   |   | chr6                 | Rev g-MutE5<br>OFF7 | TTGTGGTGGATTCCATGTGC   |
|                   | 3 | ATGCTACACAGCACTGCCAT | Fw g-MutE5<br>OFF8  | CTTGTCTGTGGCAAGTCGT    |
|                   |   | chr10                | Rev g-MutE5<br>OFF8 | AGGGATTGCCCCGTTCGATTT  |
|                   | 3 | TTGCTAAACATGAATGCCAA | Fw g-MutE5<br>OFF9  | CATGAAGGAAACCGTTGAGCA  |
|                   |   | chr6                 | Rev g-MutE5<br>OFF9 | CCATGGTTTGTTCGTGGCA    |

|                  |   |                      |                      |                      |
|------------------|---|----------------------|----------------------|----------------------|
| gE7 (score = 18) | 3 | TTCCTAAACAGCAATGCACT | Fw g-MutE5<br>OFF10  | TAGGGACTGGTGAGCACTGA |
|                  |   | chr1                 | Rev g-MutE5<br>OFF10 | GGAAGAGTCACCTCTGAGCG |
|                  | 3 | AGGTAGAGGAGTGCATGACC | Fw g-MutE7<br>OFF3   | GCTGCTAGAAGCTCCACTGT |
|                  |   | chr17                | Rev g-MutE7<br>OFF3  | AGCACCAACGACAGTCCAAA |
|                  | 3 | AGGGAGAGGAGAACATGATC | Fw g-MutE7<br>OFF6   | TCAACAGGGAAGCATGTGGT |
|                  |   | chr12                | Rev g-MutE7<br>OFF6  | TGGAAGTGGAGCTGGAGAGA |
|                  | 3 | AGGCAGTGGAGAAAAGGACC | Fw g-MutE7<br>OFF7   | GGGTTTGGGATCCTCTGCAA |
|                  |   | chr11                | Rev g-MutE7<br>OFF7  | GGTGAGCACTGCCTTGATCT |
|                  | 3 | GGGTAGTGGAGACCAAGACC | Fw g-MutE7<br>OFF10  | ACGTCTTCCCTGTCCGTTTC |
|                  |   | chr13                | Rev g-MutE7<br>OFF10 | TCCAGGGTTGCCTGTTGTTT |

**Table S3. Vector copy number of transduced cells.** Vector copy number (VCN) of murine cells (Sol8 E2\_1, RAW 264.7 and Hepa 1-6) and human cells (K562, Meg-01 and SJCRH30) transduced with lentiviral vectors expressing murine GAA (SIFLG, SIFG and S2G). Calculated by qPCR (see M&M).

|           |       | VCN          |
|-----------|-------|--------------|
| E2_1      | NT    | 0.01 ± 0.01  |
|           | SIFLG | 3.14 ± 1.18  |
|           | SIFG  | 2.22 ± 0.33  |
|           | S2G   | 3.28 ± 1.06  |
| RAW 264.7 | NT    | 0.01 ± 0.00  |
|           | SIFLG | 4.11 ± 0.88  |
|           | SIFG  | 6.77 ± 2.09  |
|           | S2G   | 4.28 ± 0.46  |
| Hepa 1-6  | NT    | 0.01 ± 0.01  |
|           | SIFLG | 22.19 ± 3.25 |
|           | SIFG  | 8.5 ± 1.52   |
|           | S2G   | 27.4 ± 4.66  |
| K562      | NT    | 0.01 ± 0.00  |
|           | SIFLG | 14.48 ± 1.73 |
|           | SIFG  | 15.33 ± 4.65 |
|           | S2G   | 15.45 ± 4.45 |
| Meg-01    | NT    | 0.00 ± 0.00  |
|           | SIFLG | 13.98 ± 5.44 |
|           | SIFG  | 34.10 ± 4.00 |
|           | S2G   | 18.10 ± 5.26 |
| SJCRH30   | NT    | 0.01 ± 0.00  |
|           | SIFLG | 17.17 ± 1.63 |
|           | SIFG  | 24.57 ± 3.59 |
|           | S2G   | 17.38 ± 5.34 |
